# Supplementary material for: A nanoclay-confined single atom catalyst: tuning uncoordinated N species for efficient water treatment
Source: Royal Society of Chemistry journal article supplement (doi:10.1039/d2tc01835g), 2022-01-01
Supplement: d2tc01835g1.pdf [file d2tc01835g1.pdf]

## Supporting Information

### Nanoclay-confined single atom catalyst: Tuning uncoordinated N species for efficient water treatment

*Xiongbo Dong,<sup>abc</sup> Yinyin Qian,<sup>abc</sup> Zitong Chen,<sup>abc</sup> Zhiyi Jiang,<sup>abc</sup> Aidong Tang<sup>d</sup> and Huaming Yang<sup>abce\*</sup>*

*<sup>a</sup> Engineering Research Center of Nano-Geomaterials of Ministry of Education, China University of Geosciences, Wuhan 430074, China*

*<sup>b</sup> Faculty of Materials Science and Chemistry, China University of Geosciences, Wuhan 430074, China*

*<sup>c</sup> Key Laboratory of Functional Geomaterials in China Nonmetallic Minerals Industry, China University of Geosciences, Wuhan 430074, China*

*<sup>d</sup> School of Chemistry and Chemical Engineering, Central South University, Changsha 410083, China*

*<sup>e</sup> Hunan Key Laboratory of Mineral Materials and Application, School of Minerals Processing and Bioengineering, Central South University, Changsha 410083, China*

*\*Corresponding author, Email: hm.yang@cug.edu.cn, hmyang@csu.edu.cn, Fax: +86-27-68788733*

## **Contents:**

**Supplementary note 1.** Electrochemical measurements

**Supplementary note 2.** EXAFS fitting methods

**Supplementary note 3.** Computational methods

**Supplementary note 4.** Computational results

**Fig. S1 to S31**

**Table S1 to S9**

**References**

### **Supplementary note 1. Electrochemical measurements**

The ITO electrode modified with p-MnNC@Mt-X was first prepared<sup>1</sup>. Nafion solution (5.0 wt% isopropanol in DI water, 0.03 mL), isopropanol (0.50 mL), DI water (0.47 mL), and p-MnNC@Mt-X powder (5 mg) were mixed and dispersed after 60 min ultrasonication. 5  $\mu$ L of above suspension was dropped onto the surface of ITO electrode, and dried at room temperature under vacuum overnight. Linear sweep voltammogram (LSV) and chronoamperometric curves were performed on an electrochemical workstation (CHI 660E, Shanghai Chenhua Instrument Co., China). The counter, reference, and working electrodes were platinum-wire electrode, saturated calomel electrode, and a modified ITO, respectively. LSV measurements were recorded at the potential scan rate of 5 mV s<sup>-1</sup> from 0.3 to 1.0 V. Chronoamperometric curves data were obtained at 0.00 V.

### **Supplementary note 2. EXAFS fitting methods**

The obtained XAFS data was processed in Athena (version 0.9.26) for background, pre-edge line and post-edge line calibrations. Then Fourier transformed fitting was carried out in Artemis (version 0.9.26). The  $k_3$  weighting,  $k$ -range of 3-12  $\text{\AA}^{-1}$  and  $R$  range of 2-3  $\text{\AA}$  were used for the fitting of Mn foil. The  $k$ -range of 3-6.5  $\text{\AA}^{-1}$  and  $R$  range of 1-3  $\text{\AA}$  were used for the fitting of Mn. Four parameters, coordination number, bond length, Debye-Waller factor and  $E_0$  shift (CN,  $R$ ,  $\sigma^2$ ,  $\Delta E_0$ ) were fitted without anyone was fixed, constrained, or correlated.

### **Supplementary note 3. Computational methods**

The P-(S, T, or F)-MnC<sub>4</sub>, G-(S, T, or F)-MnC<sub>4</sub>, P-S-MnN<sub>4</sub>, and P-S-MnN<sub>4</sub> surfaces were built, where the vacuum space along the  $z$  direction was set to be 20  $\text{\AA}$ , which was enough to avoid interaction between the two neighboring images. Then, one HSO<sub>5</sub><sup>-</sup> was loaded on the surface. All atoms were relaxed adequately. The first principles calculations in the framework of density functional theory were carried out based on the Cambridge Sequential Total Energy Package known as CASTEP.<sup>2</sup> The exchange–correlation functional under the generalized gradient approximation (GGA) with norm-conserving pseudopotentials and Perdew–Burke–Ernzerhof functional was adopted to describe the electron–electron interaction.<sup>3,4</sup> An energy cutoff of 500 eV was used and a  $k$ -point sampling set of  $6 \times 6 \times 1$

were tested to be converged. A force tolerance of  $0.01\text{eV \AA}^{-1}$ , energy tolerance of  $1.0 \times 10^{-5}$  eV per atom, and maximum displacement of  $1.0 \times 10^{-3}$  Å were considered. The spin unrestricted was used and the Grimme method for DFT-D correction was considered for all calculations<sup>5</sup>. The adsorption energy of A= HSO<sub>5</sub><sup>-</sup> was calculated by:<sup>5</sup>

$$\Delta E_A = E_{*A} - E^* - E_A \quad (2)$$

where  $E_{*A}$ ,  $E^*$ , and  $E_A$  denote the energy of adsorbed system, clear surface, and A group.

#### Supplementary note 4. Computational results

As displayed in Fig. 6, we investigated the influence of uncoordinated N species on the interaction between peroxymonosulfate (PMS) and Mn single atom centers via taking uncoordinated N species in second coordination sphere of MnC<sub>4</sub> moieties as a case. The results show that uncoordinated N species around MnC<sub>4</sub> centers affect the release of intermediates via regulating electron localization of Mn, rather than breaking the O–O bonds and the charge transfer between MnC<sub>4</sub> and PMS. Considering that Mn single atoms in p-MnNC@Mt-900 might exist with MnN<sub>4</sub> moieties, the relevant theory calculations were then carried out via taking the MnN<sub>4</sub> moieties surrounded by uncoordinated N species as an example. As displayed in Fig. S27a~27d, the interfacial configurations of two possible models in which MnN<sub>4</sub> centers are surrounded by pyridinic N and graphitic N (denoted as P-S-MnN<sub>4</sub> and G-S-MnN<sub>4</sub>), as well as the adsorption structure of PMS molecules on P-S-MnN<sub>4</sub> and G-S-MnN<sub>4</sub>, were constructed and optimized. It is found that uncoordinated N species around MnN<sub>4</sub> centers have nearly no effect on breaking the O–O bonds and the charge transfer between MnN<sub>4</sub> and PMS (Fig. S27a-S27d, Table S7).<sup>6-8</sup> In addition, the density of states results suggest that uncoordinated graphitic nitrogen in NG-SACs has a downshifted d-band center of Mn versus pyridinic nitrogen (Fig. S27e). The lower energy level optimizes the bonding energy of the intermediates on single atom centers, accelerating the release of intermediates and regeneration of active sites.<sup>9</sup> In fact, the uncoordinated N species might be not so close to the Mn atoms. Of note, all above similar results could also be obtained although uncoordinated N species are not so close to Mn atoms (Fig. S28&S29). In this regard, it is reasonable to assume that uncoordinated graphitic nitrogen (versus pyridinic nitrogen)

can preferably weaken electronic localization of Mn, thereby accelerating the release of intermediates on Mn single atom centers and enhancing PMS activation efficiency.

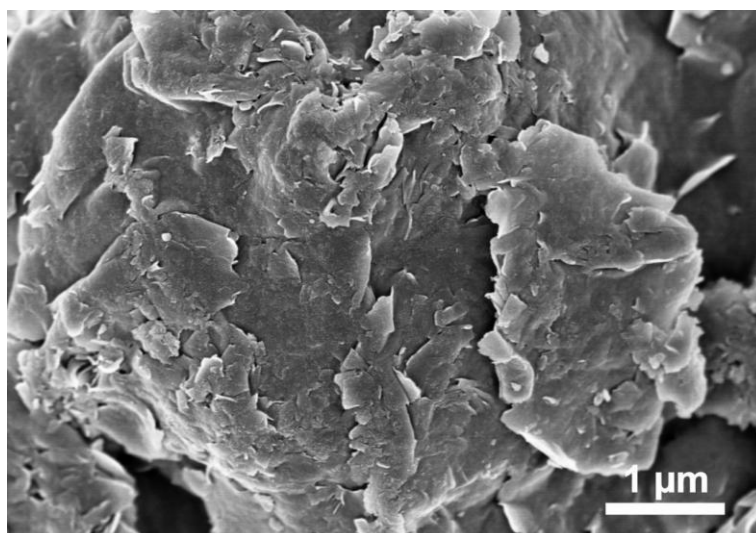

**Fig. S1** SEM image of Mt.

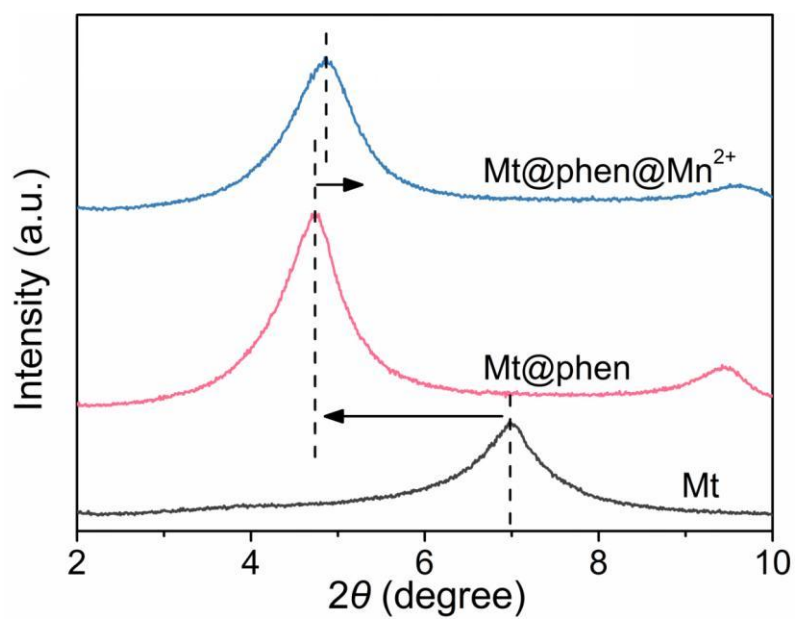

**Fig. S2** XRD patterns of Mt, Mt@phen@Mn<sup>2+</sup>, and MnNC@Mt.

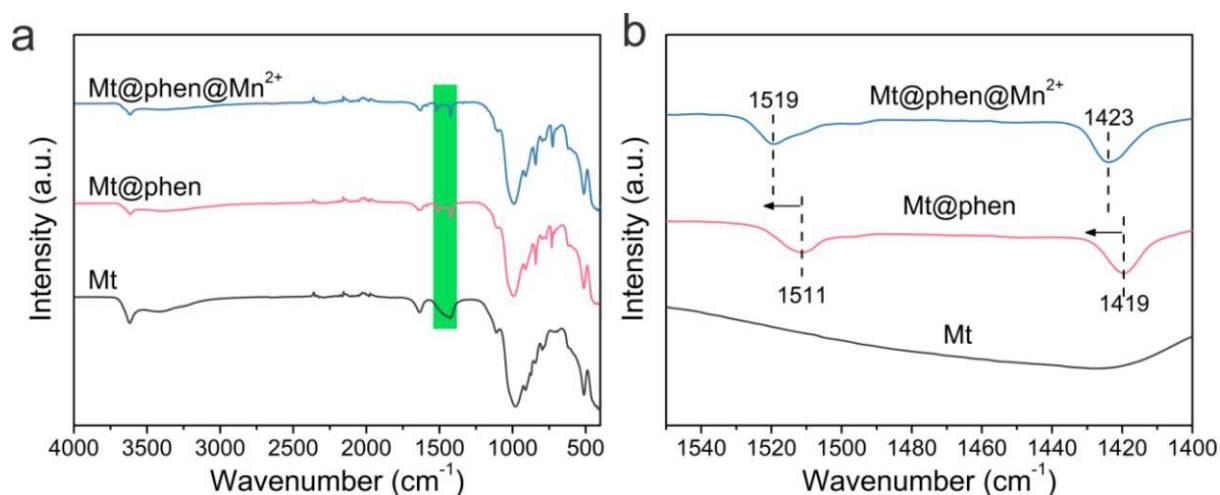

**Fig. S3** (a) FTIR spectra of Mt, Mt@phen, and Mt@phen@Mn<sup>2+</sup>. (b) The corresponding enlarged area marked with green paint in (a).

FTIR was further conducted to clarify the coordination between 1,10-phenanthroline and Mn<sup>2+</sup>. As shown in Fig. S3, distinct from the FTIR spectra of Mt, two pristine absorption bands located at 1419 and 1511 cm<sup>-1</sup>, which are assigned to the bending and stretching vibration of C=N in 1,10-phenanthroline respectively, could be detected in that of Mt@phen. This result demonstrates the insertion of 1,10-phenanthroline into the interlayer space of Mt. After the insertion of Mn<sup>2+</sup> into the interspace of Mt, the blue-shifts observed in above two peaks indicates the coordination between 1,10-phenanthroline and Mn<sup>2+</sup>, which is consistent with the slight decrease of interlayer spacing of Mt in *ex situ* XRD (Fig. S2).<sup>10</sup>



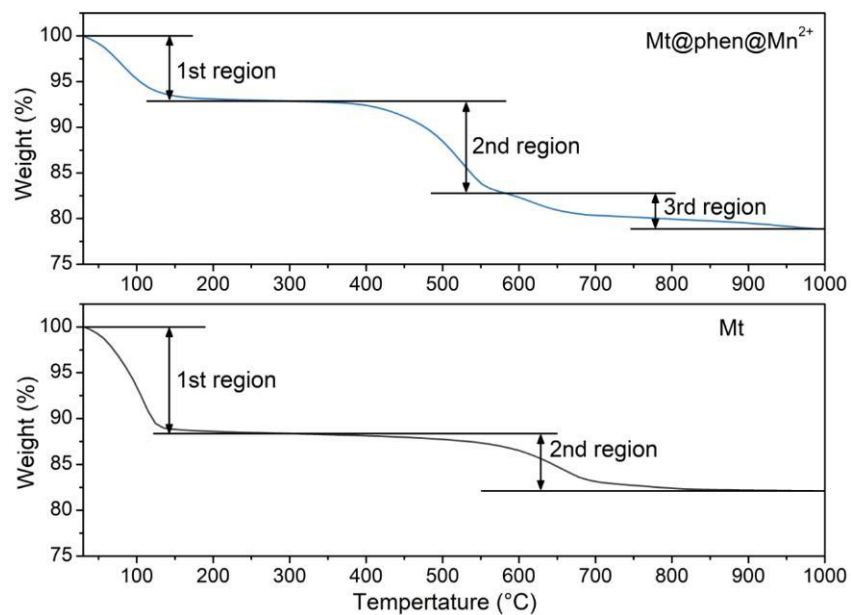

**Fig. S4** TGA curve of  $Mt$  and  $Mt@phen@Mn^{2+}$  under  $N_2$  atmosphere.

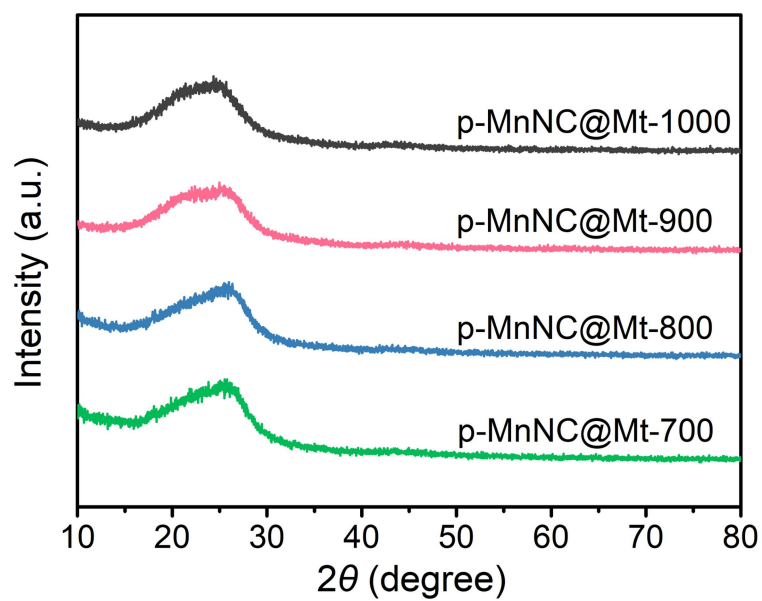

**Fig. S5** XRD patterns for p-MnNC@Mt-X (X = 700, 800, 900, and 1000).

No Mn metal peak observed in p-MnNC@Mt-X demonstrates the possible formation of single Mn atoms (Fig. S5).

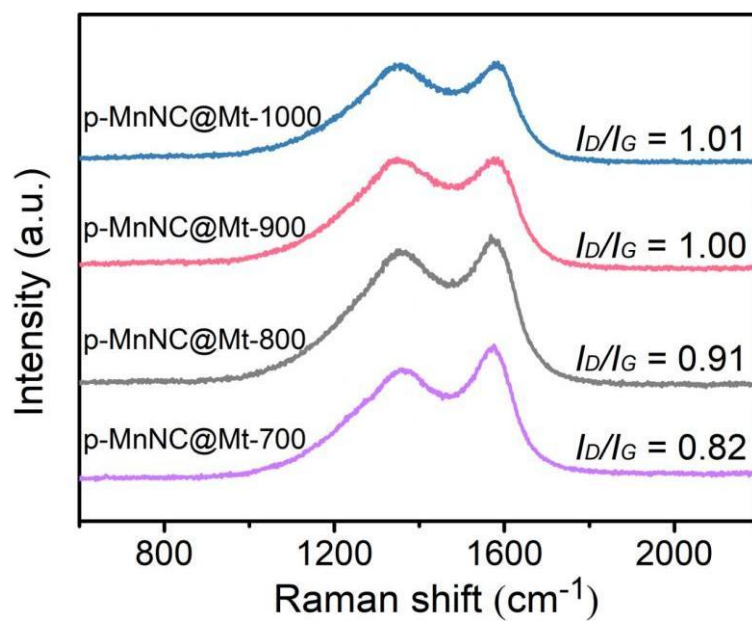

**Fig. S6** Raman spectroscopy of p-MnNC@Mt-X.

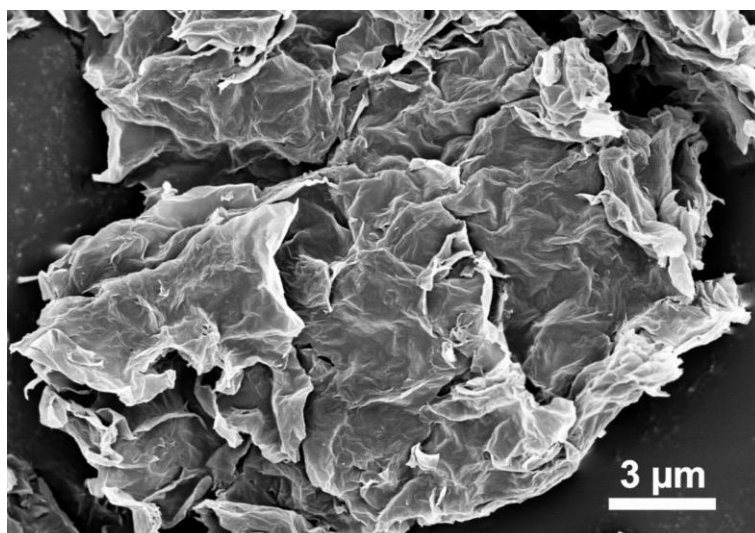

**Fig. S7** SEM image of p-MnNC@Mt-900.

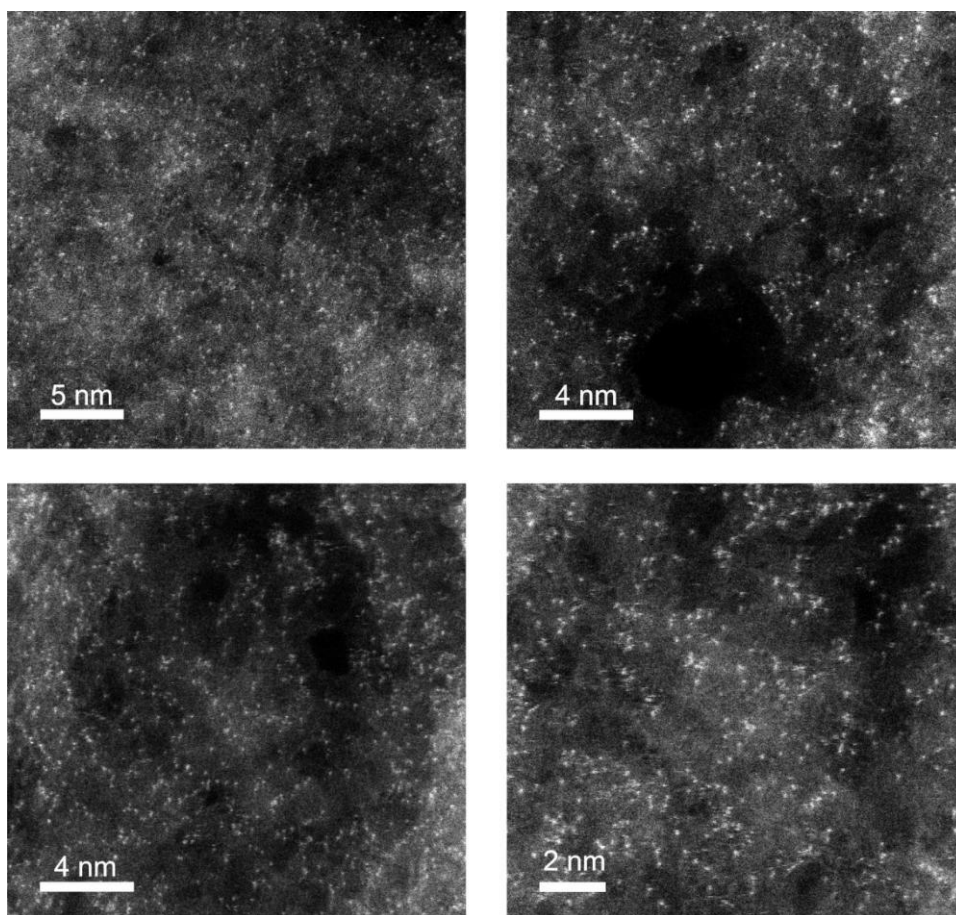

**Fig. S8** HADDF-STEM images of p-MnNC@Mt-900.

To provide convincing proofs for the generation of Mn single atoms, more HADDF-STEM images of p-MnNC@Mt-900 were recorded. As seen in Fig. S8, no nanoparticles or clusters are detected in all the HADDF-STEM images. In addition, the clearly exclusive bright dots in HADDF-STEM images further identify the existence of isolated Mn single atoms in p-MnNC@Mt-900.

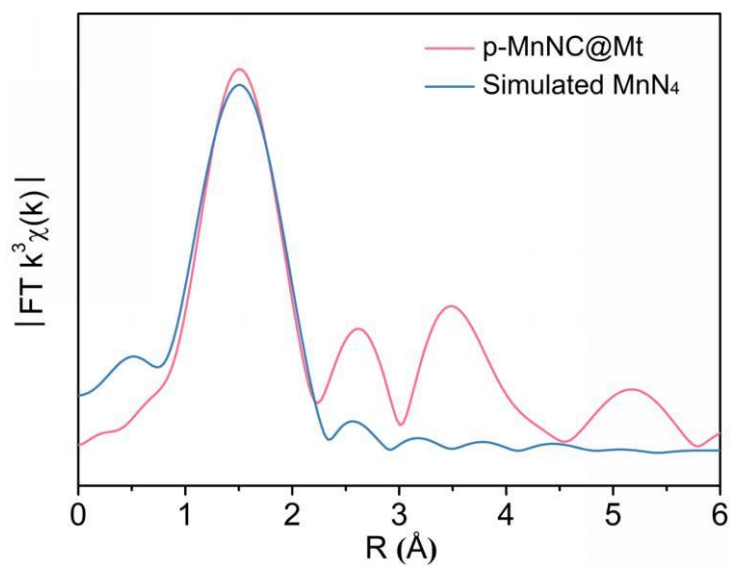

**Fig. S9** The prediction of Fourier-transformed  $k^3$ -weighted EXAFS curve (R space) for MnN<sub>4</sub>.

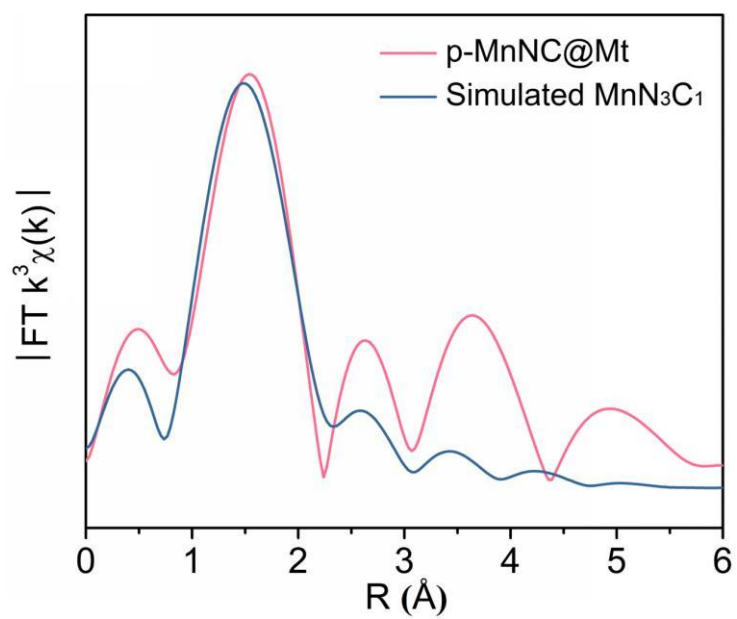

**Fig. S10** The prediction of Fourier-transformed  $k^3$ -weighted EXAFS curve (R space) for  $\text{MnN}_3\text{C}_1$ .

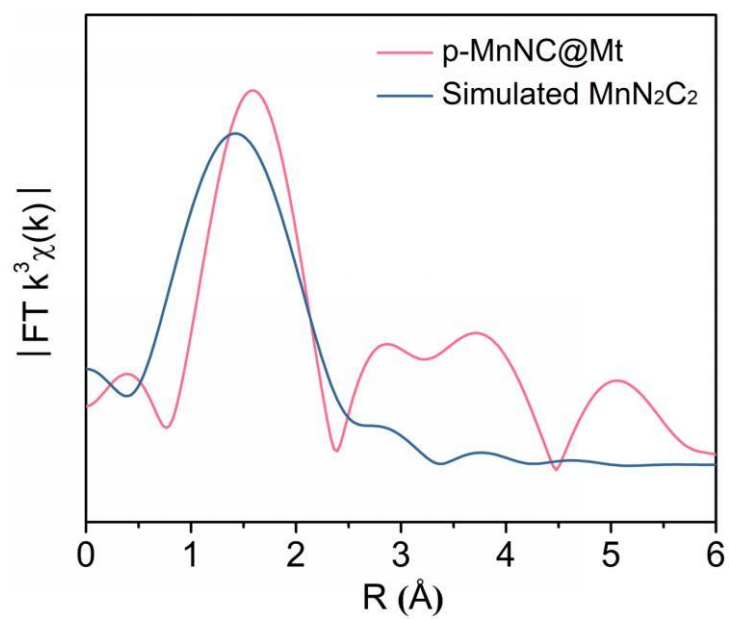

**Fig. S11** The prediction of Fourier-transformed  $k^3$ -weighted EXAFS curve (R space) for MnN<sub>2</sub>C<sub>2</sub>.



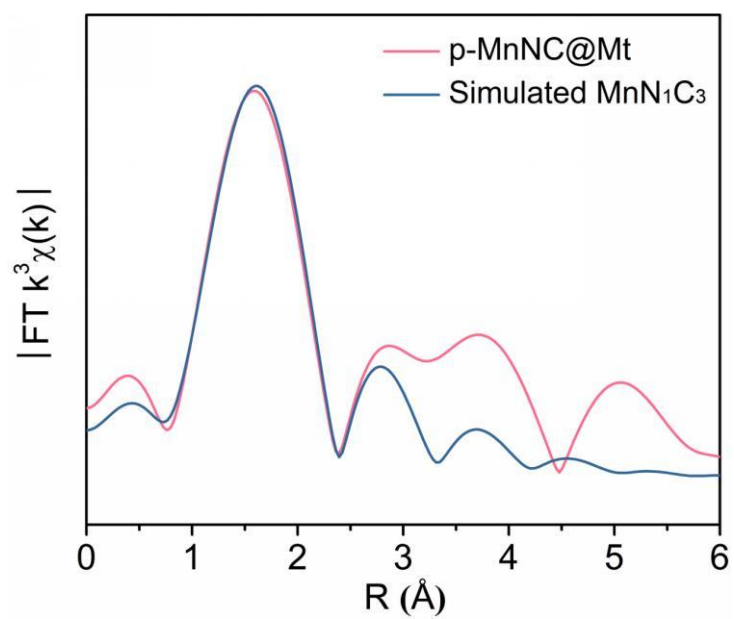

**Fig. S12** The prediction of Fourier-transformed  $k^3$ -weighted EXAFS curve (R space) for MnN<sub>1</sub>C<sub>3</sub>.

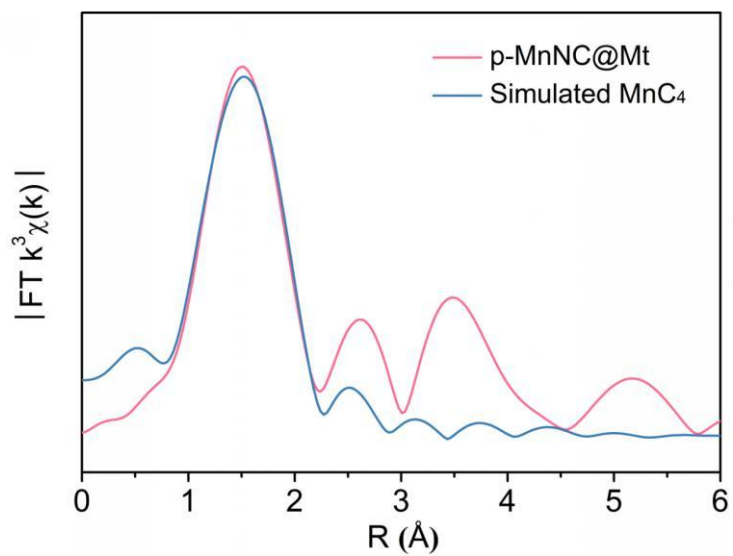

**Fig. S13** The prediction of Fourier-transformed  $k^3$ -weighted EXAFS curve (R space) for  $\text{MnC}_4$ .

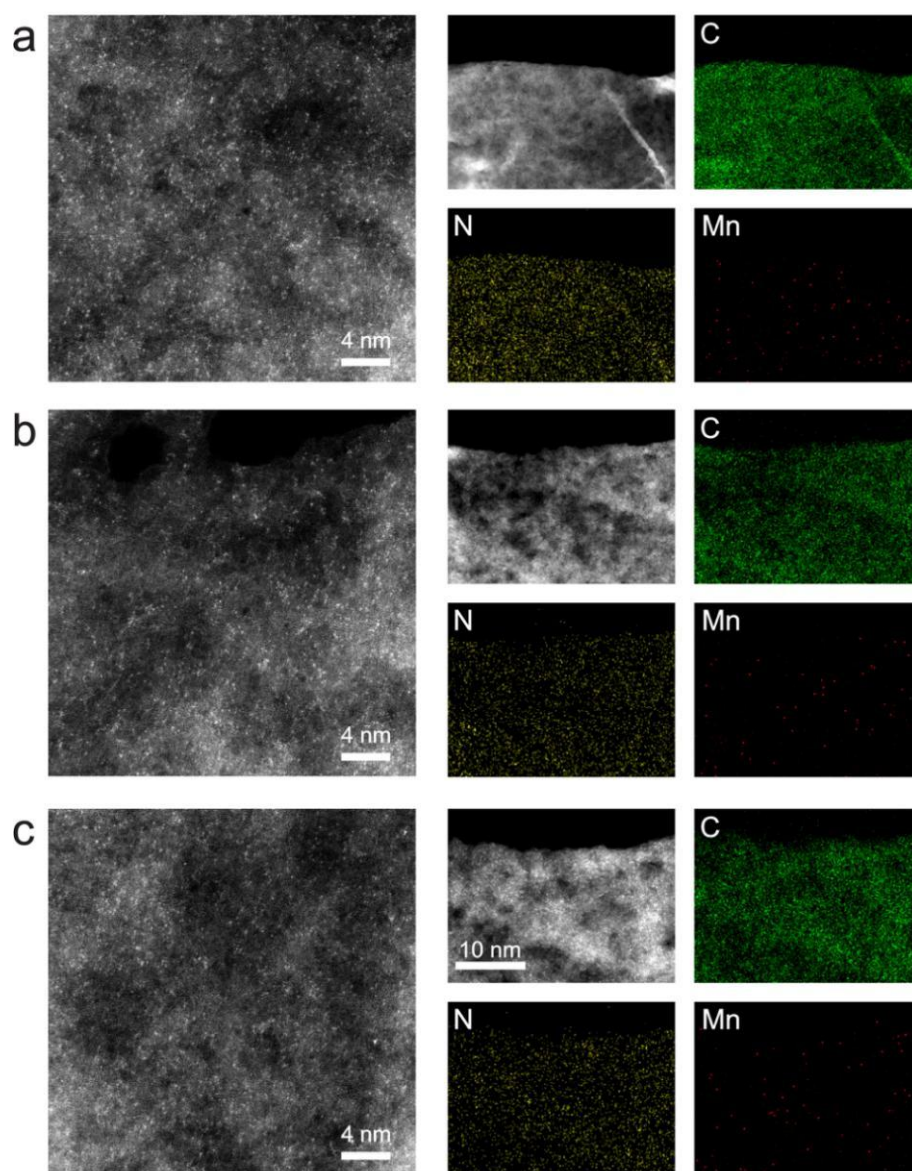

**Fig. S14** HADDF-STEM images and corresponding EDX mappings of (a) p-MnNC@Mt-700, (b) p-MnNC@Mt-800 and (c) p-MnNC@Mt-1000.

The exclusive bright dots and the homogeneous distribution of Mn, N and C atoms could be detected in HADDF-STEM images and corresponding energy dispersive X-ray (EDX) mappings of all p-MnNC@Mt-X samples despite changing the pyrolysis temperature (Fig. S14). These results demonstrate that our proposed nano-confinement strategy is a general method for NG-SACs.

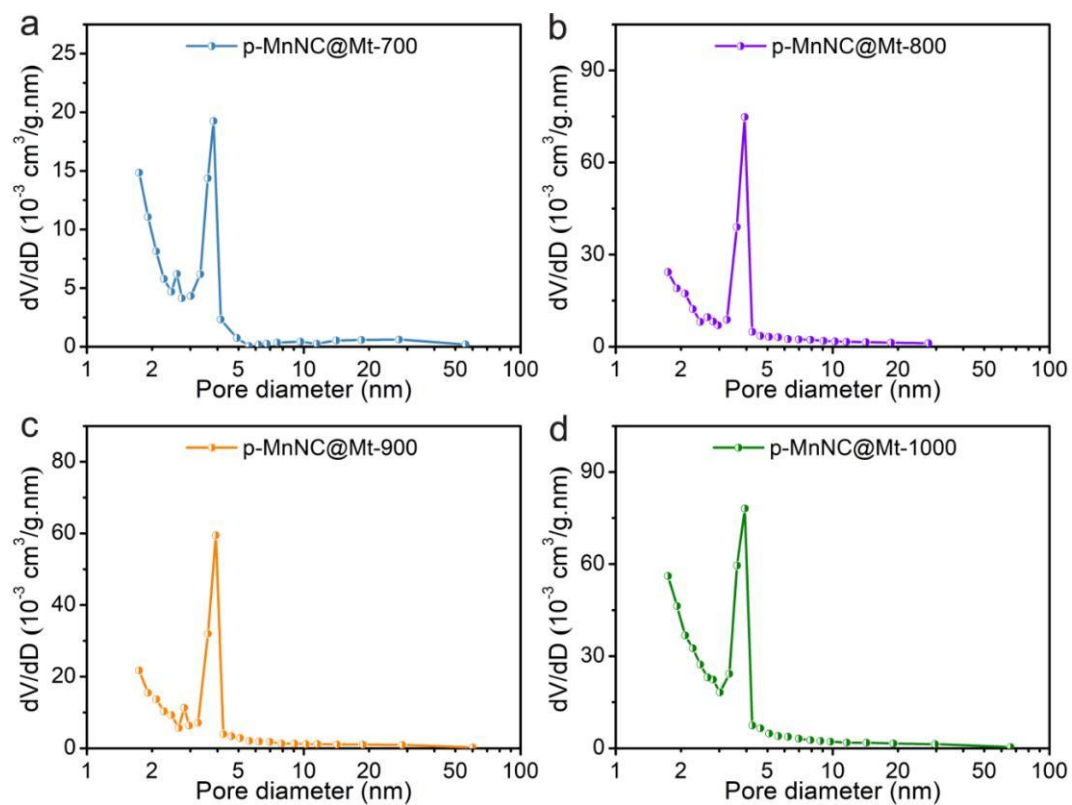

**Fig. S15** Pore size distributions for p-MnNC@Mt-X (X = 700, 800, 900, and 1000).

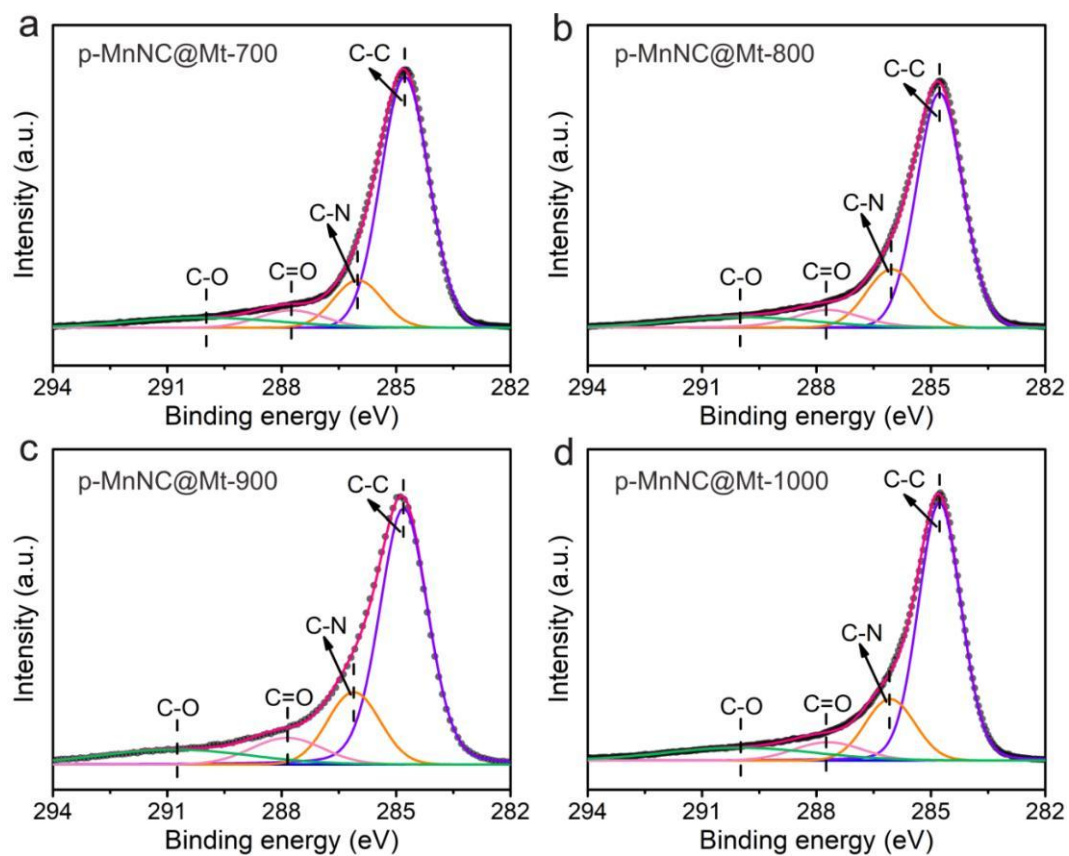

**Fig. S16** Deconvolution of the high-resolution of C1s for p-MnNC@Mt-X (X = 700, 800, 900, and 1000).

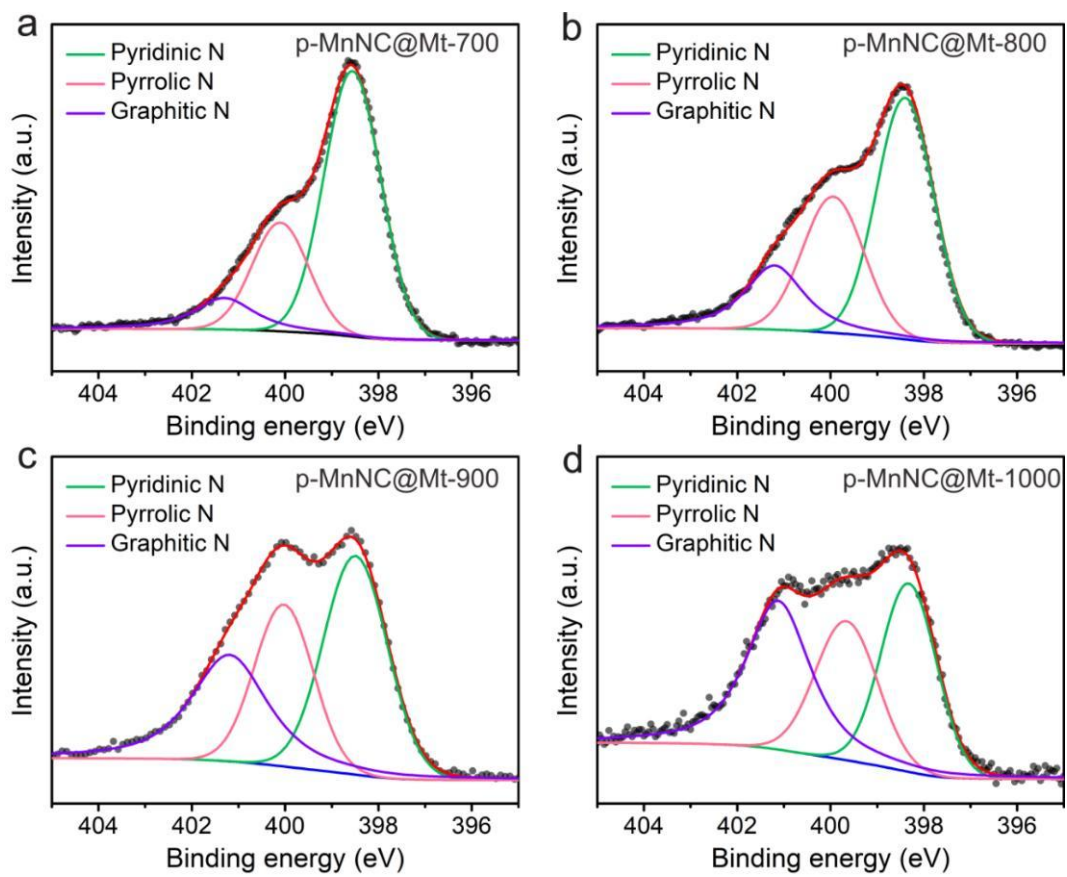

**Fig. S17** Deconvolution of the high-resolution of N1s for p-MnNC@Mt-X (X = 700, 800, 900, and 1000).

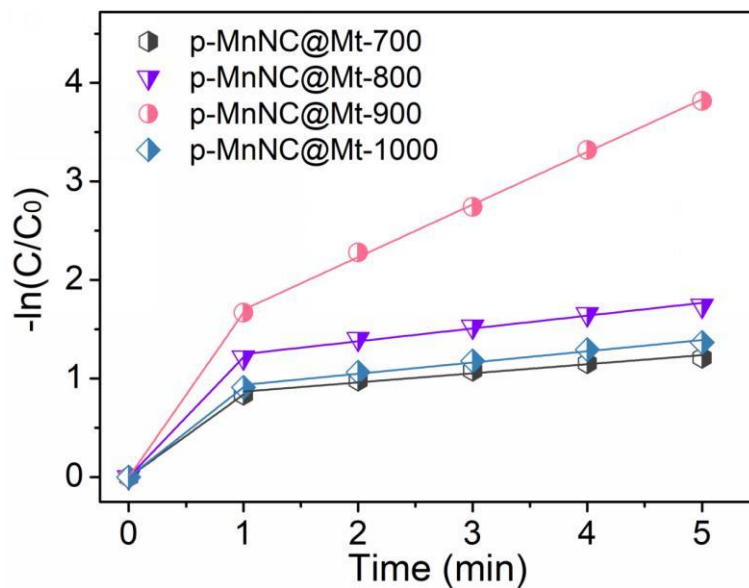

**Fig. S18** Pseudo-first-order kinetics for BPA degradation in p-MnNC@Mt-X/PMS systems. Experimental conditions:  $[BPA]_0 = 10 \text{ mg/L}$ ;  $[Catalyst]_0 = 0.1 \text{ g/L}$ ;  $[PMS]_0 = 1.0 \text{ mM}$ .

As displayed in Fig. S18, a two-stage oxidation process could be observed in all p-MnNC@Mt-X/PMS systems. Previous study has proven that the initial stage was ascribed to the direct electron transfer between catalysts, PMS and organic molecules.<sup>11</sup> In this work, the direct electron transfer process dominates the BPA degradation in all p-MnNC@Mt-X/PMS systems. In this regard, the initial stage was used to determine the BPA removal rate constant ( $k$ ).

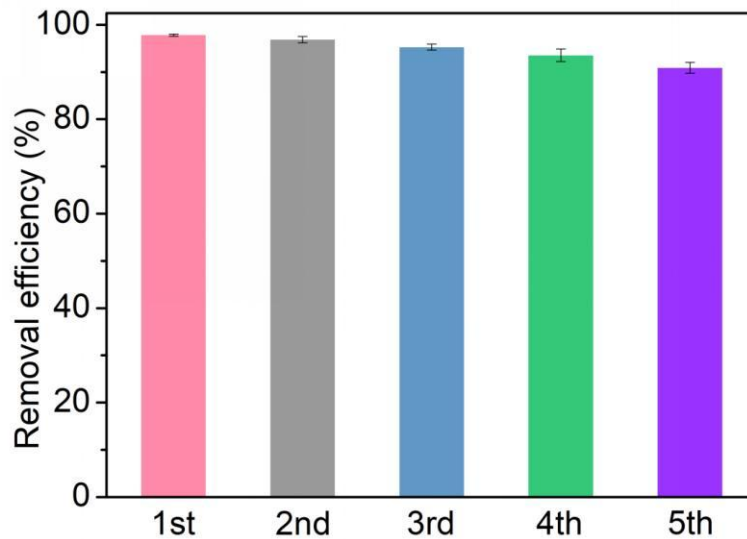

**Fig. S19** BPA degradation efficiency in five consecutive runs by p-MnNC@Mt-900/PMS system.

Experimental conditions:  $[BPA]_0 = 10 \text{ mg/L}$ ;  $[Catalyst]_0 = 0.1 \text{ g/L}$ ;  $[PMS]_0 = 0.6 \text{ mM}$ .

After five consecutive runs, p-MnNC@Mt-900 still shows the excellent PMS activation efficiency for BPA removal (Fig. S19).



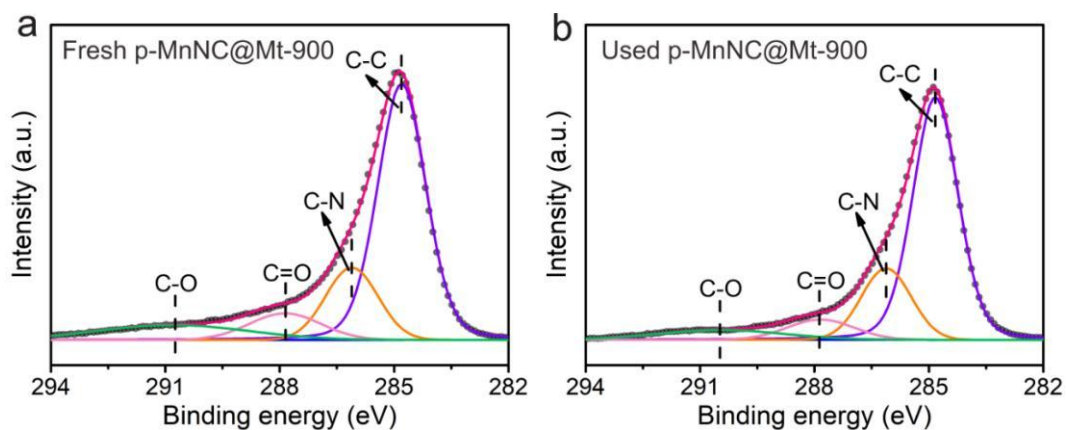

**Fig. S20** C 1s photoemission spectra of fresh and used p-MnNC@Mt-900.

The C 1s core-level spectra of fresh and used p-MnNC@Mt-900 could be well divided into four peaks, which is ascribed to C-O, C=O, C-N, and C-C (Fig. S20). These carbon-based functional groups of p-MnNC@Mt-900 show negligible changes after 5 cycle runs.

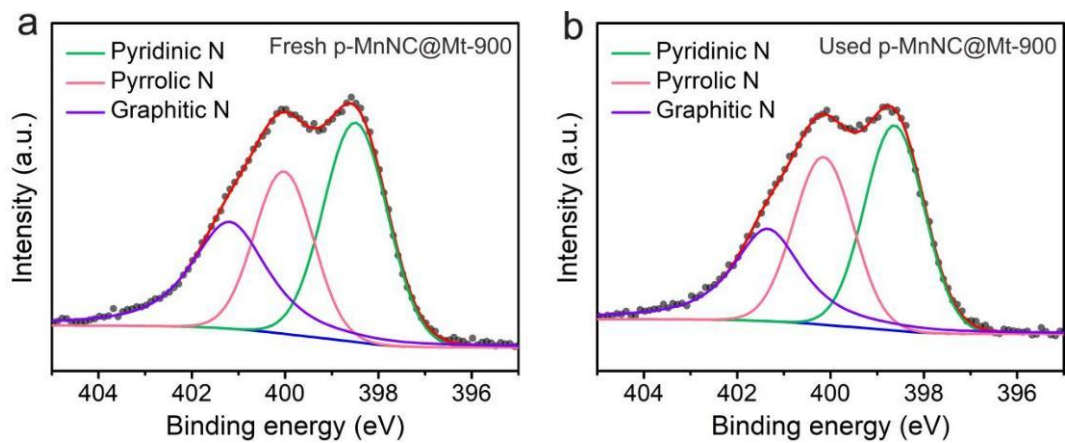

**Fig. S21** N 1s photoemission spectra of fresh and used p-MnNC@Mt-900.

The p-MnNC@Mt-900 preserves the ratio of pyridinic N, pyrrolic N, and graphitic N (Fig. S21).

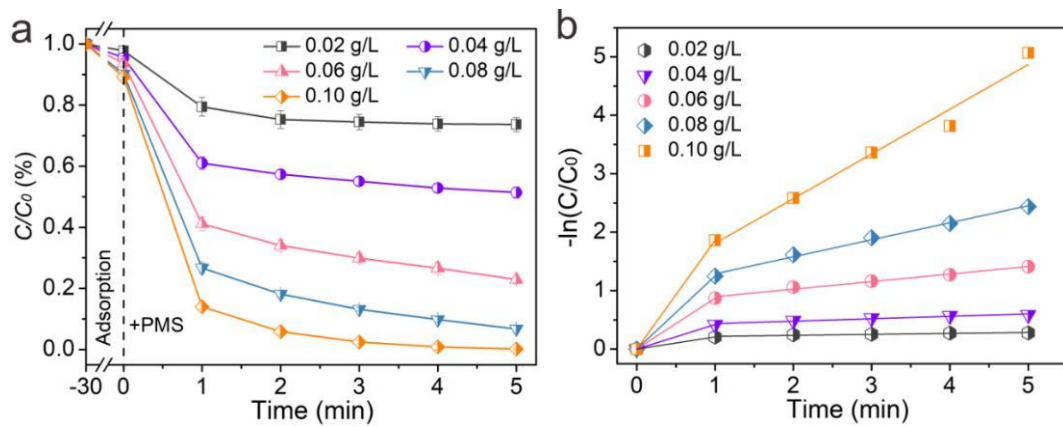

**Fig. S22** (a) Effect of catalyst dosage on BPA degradation catalyzed by p-MnNC@Mt-900/PMS system. (b) The corresponding pseudo-first-order kinetics. Experimental conditions:  $[BPA]_0 = 10$  mg/L;  $[PMS]_0 = 1.0$  mM.

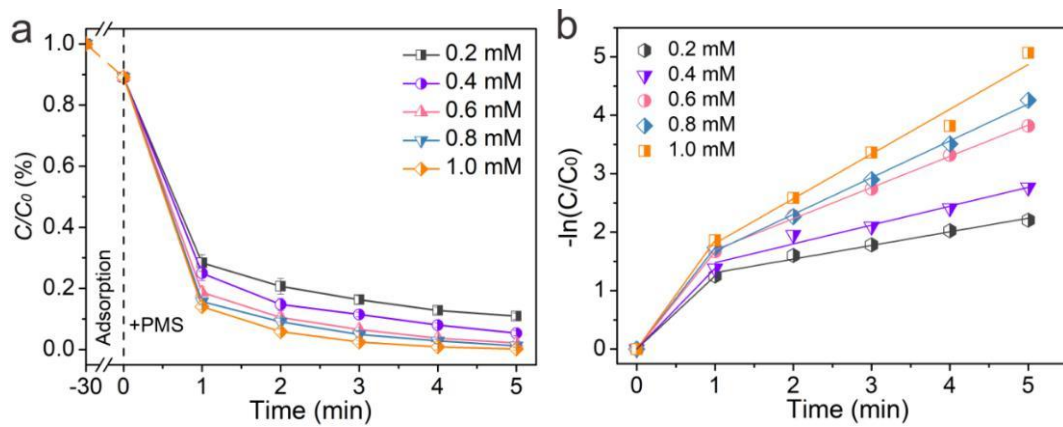

**Fig. S23** (a) Effect of PMS concentration on BPA degradation catalyzed by p-MnNC@Mt-900/PMS system. (b) The corresponding pseudo-first-order kinetics. Experimental conditions:  $[BPA]_0 = 10$  mg/L;  $[Catalyst]_0 = 0.1$  g/L.

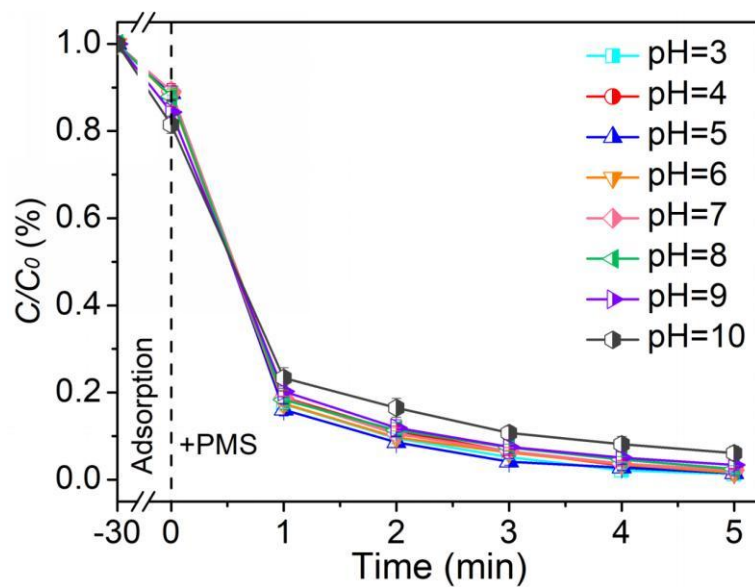

**Fig. S24** Effect of initial pH value on BPA degradation catalyzed by p-MnNC@Mt-900/PMS system.

Experimental conditions:  $[BPA]_0 = 10$  mg/L;  $[Catalyst]_0 = 0.1$  g/L;  $[PMS]_0 = 0.6$  mM.

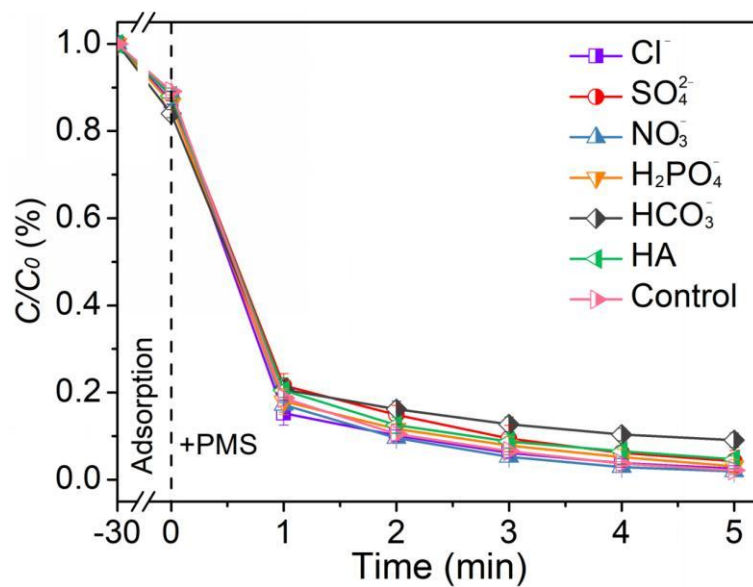

**Fig. S25** Effects of inorganic anions and HA ( $[\text{NO}_3^-] = [\text{SO}_4^{2-}] = [\text{Cl}^-] = [\text{H}_2\text{PO}_4^-] = [\text{HCO}_3^-] = 20$  mM;  $[\text{HA}] = 20$  mg/L) on BPA degradation catalyzed by p-MnNC@Mt-900/PMS system. Experimental conditions:  $[\text{BPA}]_0 = 10$  mg/L;  $[\text{Catalyst}]_0 = 0.1$  g/L;  $[\text{PMS}]_0 = 0.6$  mM.

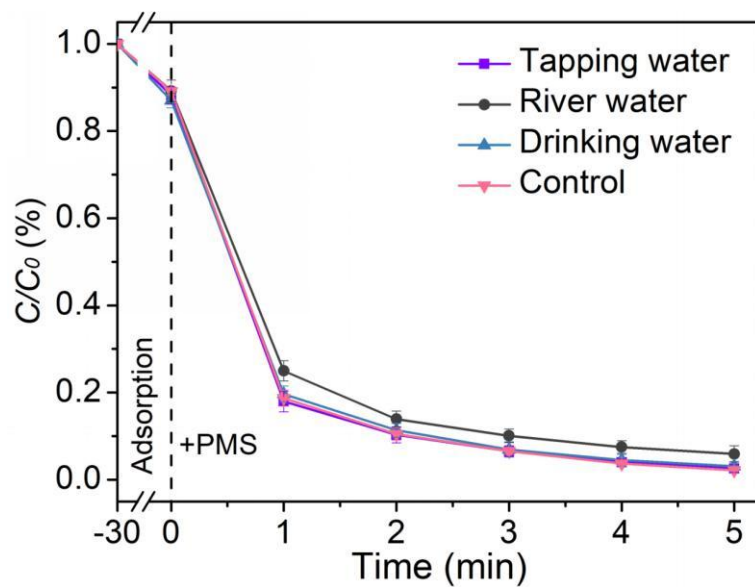

**Fig. S26** BPA degradation efficiency in different water matrix by p-MnNC@Mt-900/PMS system.

Experimental conditions:  $[BPA]_0 = 10 \text{ mg/L}$ ;  $[Catalyst]_0 = 0.1 \text{ g/L}$ ;  $[PMS]_0 = 0.6 \text{ mM}$ .

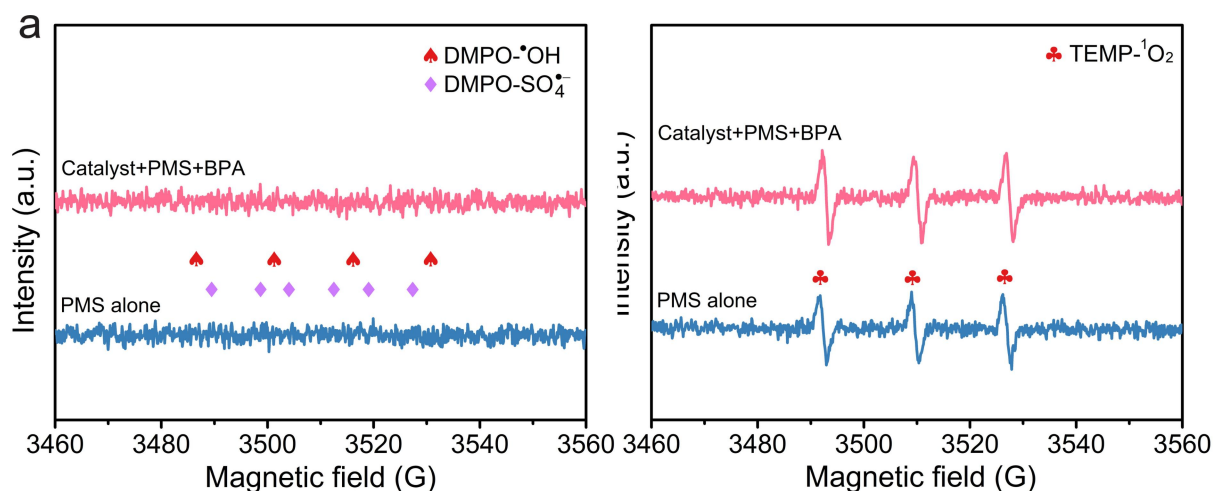

**Fig. S27** EPR spectra obtained in p-MnNC@Mt-900/PMS/BPA system using (a) DMPO and (b) TEMP as spin-trapping agents.

The EPR characterization has been added to further verify the reaction mechanisms. As seen in Fig. S27a, no detectable characteristic signals ascribed to DMPO–SO<sub>4</sub><sup>•-</sup> or DMPO–•OH adducts demonstrates absence of radical pathway (SO<sub>4</sub><sup>•-</sup> or •OH) in p-MnNC@Mt-900/PMS/BPA system. A set of characteristic signals for TEMP–<sup>1</sup>O<sub>2</sub> adducts were observed in both PMS/TEMP and p-MnNC@Mt-900/PMS/BPA/TEMP systems with the similar peak intensity (Fig. S27b). This phenomenon could be attributed to the self-decomposition of PMS, further excluding the nonradical pathway during PMS activation. Above results are well consistent with the scavenging experiments (Fig. 5b). Furthermore, the direct electron transfer pathway was evidenced by *in situ* Raman, chronoamperometric, and LSV analyses (Fig. 5c~5e).



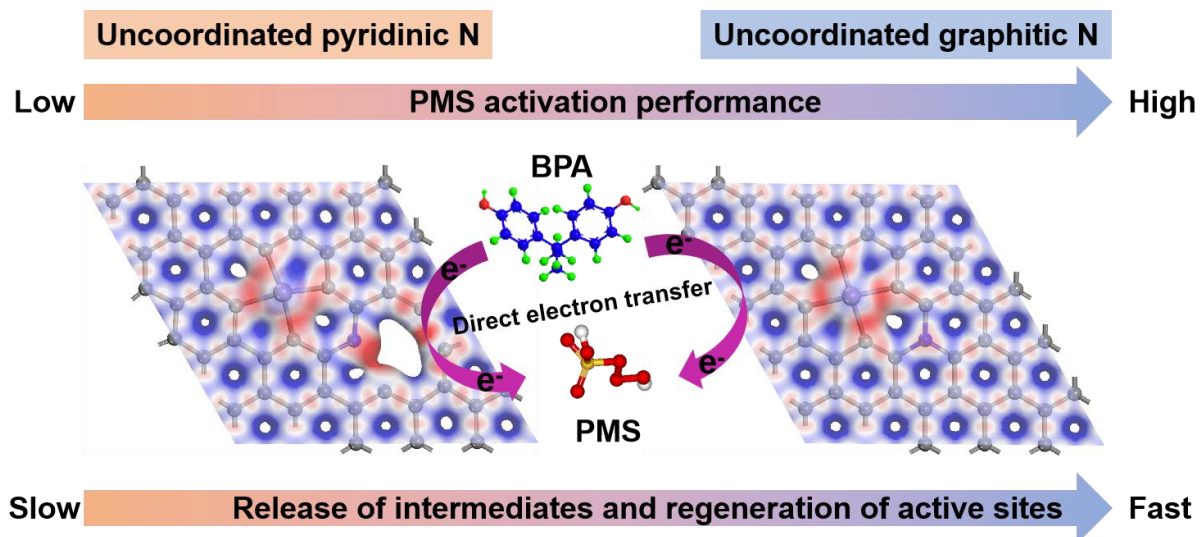

Fig. S28 Schematic outline for the mechanism of p-MnNC@Mt-X in PMS activation.

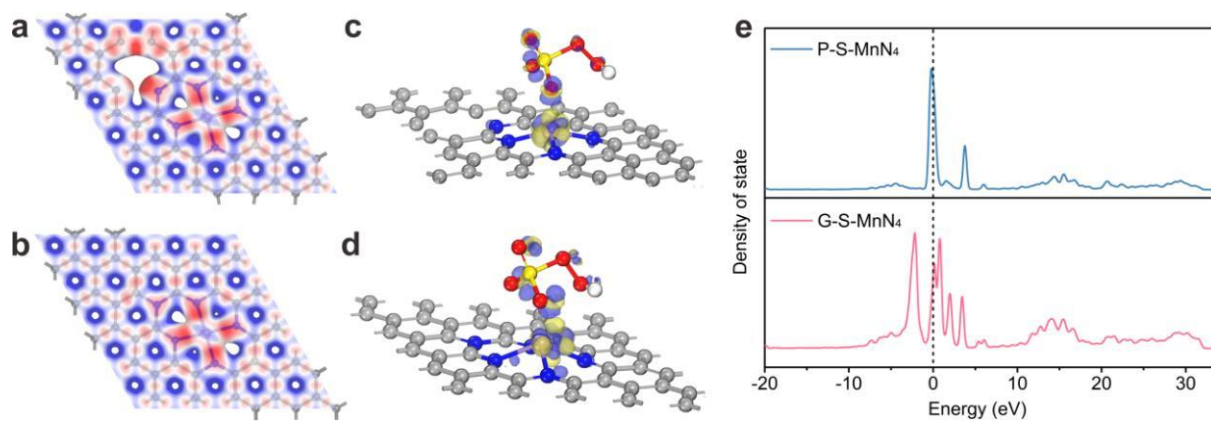

**Fig. S29** 3D differential charge densities of  $\text{MnN}_4$  centers surrounded by (a) pyridinic N (denoted as P-S-MnC<sub>4</sub>) and (b) graphitic N (denoted as G-S-MnN<sub>4</sub>) occupied in second coordination sphere. 3D differential charge densities of PMS molecules adsorbed on  $\text{MnN}_4$  centers of (c) P-S-MnN<sub>4</sub> and (d) G-S-MnN<sub>4</sub>. The projected density of states of Mn 3d in (e) P-S-MnN<sub>4</sub> and G-S-MnN<sub>4</sub>. The isovalue of electron density is set to 0.07 e/Å<sup>3</sup>.

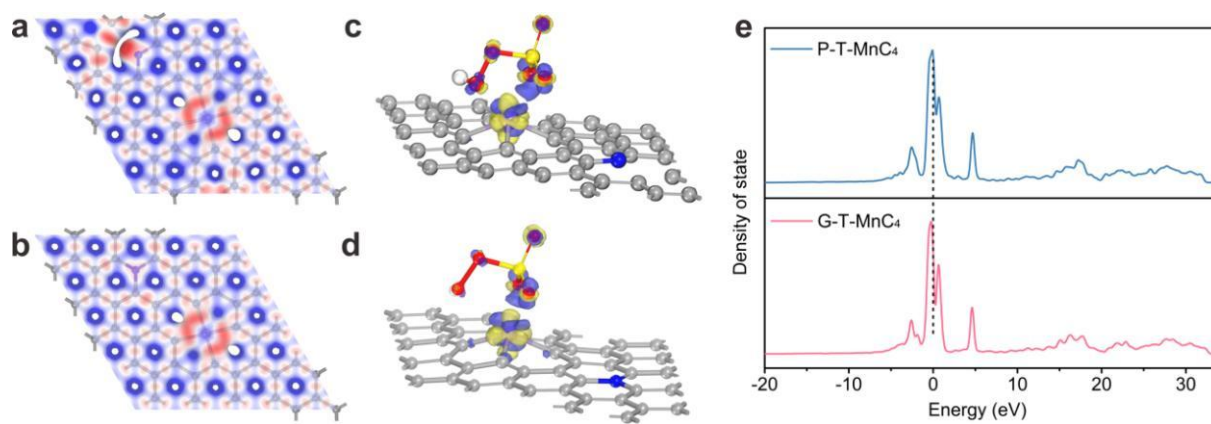

**Fig. S30** 3D differential charge densities of (a) P-T-MnC<sub>4</sub> and (b) G-T-MnC<sub>4</sub>. 3D differential charge densities of PMS molecules adsorbed on MnC<sub>4</sub> centers of (c) P-T-MnC<sub>4</sub> and (d) G-T-MnC<sub>4</sub>. The projected density of states of Mn 3d in (e) P-T-MnC<sub>4</sub> and G-T-MnC<sub>4</sub>. The isovalue of electron density is set to 0.07 e/Å<sup>3</sup>.

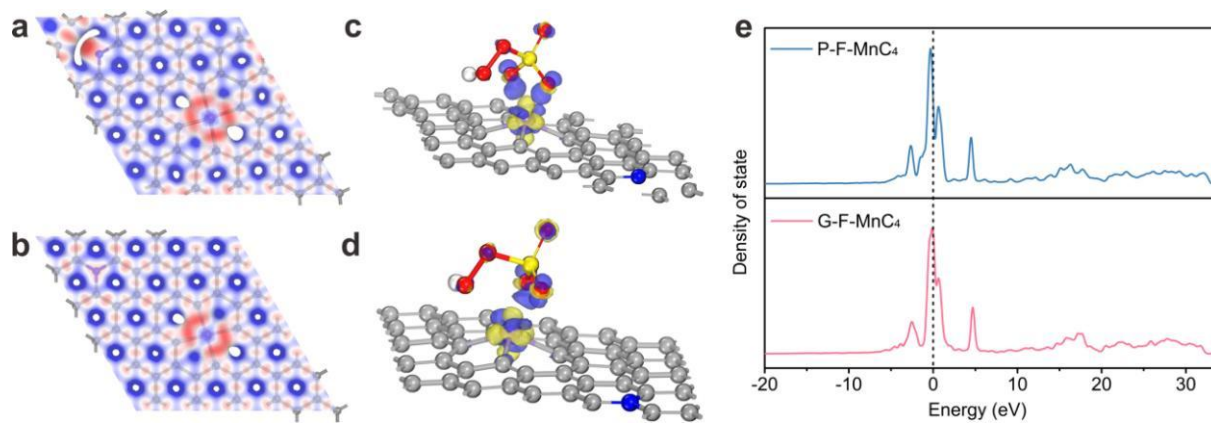

**Fig. S31** 3D differential charge densities of  $\text{MnC}_4$  centers surrounded by (a) pyridinic N (denoted as P-F- $\text{MnC}_4$ ) and (b) graphitic N (denoted as G-F- $\text{MnC}_4$ ) occupied in fourth coordination sphere. 3D differential charge densities of PMS molecules adsorbed on  $\text{MnC}_4$  centers of (c) P-F- $\text{MnC}_4$  and (d) G-F- $\text{MnC}_4$ . The projected density of states of Mn in (e) P-F- $\text{MnC}_4$  and G-F- $\text{MnC}_4$ . The isovalue of electron density is set to  $0.07 \text{ e}/\text{\AA}^3$ .

**Table S1** The chemical composition of Mt (wt %).

| SiO <sub>2</sub> | Al <sub>2</sub> O <sub>3</sub> | CaO  | Fe <sub>2</sub> O <sub>3</sub> | Na <sub>2</sub> O | MgO  | K <sub>2</sub> O | TiO <sub>2</sub> |
|------------------|--------------------------------|------|--------------------------------|-------------------|------|------------------|------------------|
| 62.63            | 17.72                          | 5.04 | 4.76                           | 4.15              | 3.87 | 1.02             | 0.25             |

**Table S2** The chemical composition of p-MnNC@Mt-900 (at %).

| C     | N    | O    | Mn   | Si   | Al   |
|-------|------|------|------|------|------|
| 83.16 | 9.51 | 6.54 | 0.02 | 0.27 | 0.50 |

**Table S3** The interlayer spacing of intermediates during the synthesis of p-MnNC@Mt-900. Herein, the basal plane spacing of Mt, which is equal to the sum of interlayer spacing and thickness of one Mt layer, was calculated by Bragg equation. The thickness of one Mt layer is 0.96 nm.

| Samples                  | Interlayer spacing (d, nm) |
|--------------------------|----------------------------|
| Mt                       | 0.32                       |
| Mt@phen                  | 0.91                       |
| Mt@phen@Mn <sup>2+</sup> | 0.86                       |
| MnNC@Mt-900              | 0.36                       |
| Mt-900                   | —                          |

**Table S4** Structural parameters extracted from the Mn K-edge EXAFS fitting.

| Samples                         | Scattering pair | CN  | R (Å) | $\sigma^2 \times 10^3$ (Å <sup>2</sup> ) | R factor |
|---------------------------------|-----------------|-----|-------|------------------------------------------|----------|
| Mn foil                         | Mn-Mn           | 12  | 2.66  | 5.6                                      | 0.012    |
| p-MnNC@Mt-900                   | Mn-C/N          | 4.2 | 1.93  | 4.8                                      | 0.017    |
| MnN <sub>4</sub>                | Mn-C            | 4   | 2.03  | 15.4                                     | 0.009    |
| MnC <sub>1</sub> N <sub>3</sub> | Mn-C            | 1   | 1.94  | 5.6                                      | 0.050    |
|                                 | Mn-N            | 3   | 1.83  |                                          |          |
| MnC <sub>2</sub> N <sub>2</sub> | Mn-C            | 2   | 1.97  | 16.2                                     | 0.118    |
|                                 | Mn-N            | 2   | 1.54  |                                          |          |
| MnC <sub>3</sub> N <sub>1</sub> | Mn-C            | 3   | 1.85  | -12.6                                    | 0.010    |
|                                 | Mn-N            | 1   | 1.57  |                                          |          |
| MnC <sub>4</sub>                | Mn-N            | 4   | 2.05  | 11.2                                     | 0.006    |

CN is the coordination number; R is interatomic distance (the bond length between Mn central atoms and surrounding coordination atoms);  $\sigma^2$  is Debye-Waller factor (a measure of thermal and static disorder in absorber-scatterer distances); R factor is used to value the goodness of the fitting.

**Table S5** Mn loadings of p-MnNC@Mt-X determined by inductively coupled plasma mass spectroscopy.

| Samples        | Mn (wt%) |
|----------------|----------|
| p-MnNC@Mt-700  | 0.11     |
| p-MnNC@Mt-800  | 0.11     |
| p-MnNC@Mt-900  | 0.10     |
| p-MnNC@Mt-1000 | 0.05     |

**Table S6** Surface and structure characterization of p-MnNC-900, Mt, and p-MnNC@Mt-X.

| Samples        | BET surface area (m <sup>2</sup> /g) |
|----------------|--------------------------------------|
| p-MnNC@Mt-700  | 120.1                                |
| p-MnNC@Mt-800  | 262.1                                |
| p-MnNC@Mt-900  | 280.4                                |
| p-MnNC@Mt-1000 | 428.6                                |

**Table S7** Relative amount of N species in p-MnNC-900 and p-MnNC@Mt-X.

| Samples        | Graphitic N | Pyrrolic N | Pyridinic N | N content (at%) |
|----------------|-------------|------------|-------------|-----------------|
| p-MnNC@Mt-700  | 10.90       | 25.80      | 63.29       | 10.91           |
| p-MnNC@Mt-800  | 19.13       | 30.43      | 50.43       | 11.46           |
| p-MnNC@Mt-900  | 31.55       | 27.70      | 40.76       | 9.51            |
| p-MnNC@Mt-1000 | 40.15       | 27.04      | 32.81       | 7.93            |

**Table S8** The Mn loadings of fresh and used p-MnNC@Mt-900 determined by inductively coupled plasma mass spectroscopy.

| Samples             | Mn (wt%) |
|---------------------|----------|
| Fresh p-MnNC@Mt-900 | 0.10     |
| Used p-MnNC@Mt-900  | 0.10     |

**Table S9** The relevant calculation results of PMS adsorption on P-(S, T, F)-MnC<sub>4</sub>, G-(S, T, F)-MnC<sub>4</sub>, P-S-MnN<sub>4</sub>, G-S-MnN<sub>4</sub>, PMS-P-(S, T, F)-MnC<sub>4</sub>, PMS-G-(S, T, F)-MnC<sub>4</sub>, PMS-P-S-MnN<sub>4</sub>, and PMS-G-S-MnN<sub>4</sub> surfaces. The adsorption energy  $E_{\text{ads}}$  and bond length  $l_{\text{O-O}}$  between -OH group and -SO<sub>4</sub> group are listed.

| Models                   | $E_{\text{ads}}$ (eV) | $l_{\text{O-O}}$ (Å) |
|--------------------------|-----------------------|----------------------|
| PMS                      | —                     | 1.373                |
| PMS-P-S-MnC <sub>4</sub> | -3.11                 | 1.491                |
| PMS-G-S-MnC <sub>4</sub> | -2.88                 | 1.494                |
| PMS-P-T-MnC <sub>4</sub> | -2.97                 | 1.473                |
| PMS-G-T-MnC <sub>4</sub> | -2.86                 | 1.473                |
| PMS-P-F-MnC <sub>4</sub> | -2.94                 | 1.473                |
| PMS-G-F-MnC <sub>4</sub> | -2.85                 | 1.477                |
| PMS-P-S-MnN <sub>4</sub> | -3.82                 | 1.480                |
| PMS-G-S-MnN <sub>4</sub> | -3.12                 | 1.481                |

**Table S10** The Mn leaching of p-MnNC@Mt-900 determined by inductively coupled plasma mass spectroscopy.

| Samples     | Mn (wt%) |
|-------------|----------|
| Mn leaching | ~        |



## References

- 1 X. Dong, Z. Chen, A. Tang, D. D. Dionysiou and H. Yang, *Adv. Funct. Mater.*, 2022, 2111565.
- 2 M. D. Segall, P. J. D. Lindan, M. J. Probert, C. J. Pickard, P. J. Hasnip, S. J. Clark, M. C. Payne, *J. Phys. Condens. Mat.* **2002**, 14, 2717.
- 3 J. P. Perdew, K. Burke, M. Ernzerhof, *Phys. Rev. Lett.* **1996**, 77, 3865.
- 4 S. Grimme, *J. Comput. Chem.* **2006**, 27, 1787.
- 5 D. R. Hamann, M. Schlüter, C. Chiang, *Phys. Rev. Lett.* **1979**, 43, 1494.
- 6 X. Duan, Z. Ao, H. Sun, L. Zhou, G. Wang and S. Wang, *Chem. Commun.*, 2015, **51**, 15249-15252.
- 7 C. Chu, J. Yang, X. Zhou, D. Huang, H. Qi, S. Weon, J. Li, M. Elimelech, A. Wang and J. Kim, *Environ. Sci. Technol.*, 2021, **55**, 1242.
- 8 J. Miao, Y. Zhu, J. Lang, J. Zhang, S. Cheng, B. Zhou, L. Zhang, P. J. J. Alvarez and M. Long, *Environ. Sci. Technol.*, 2021, **11**, 9569-9577.
- 9 S. Zuo, D. Li, Z. Guan, F. Yang, H. Xu, D. Xia and J. Wan, *ACS Appl. Mater. Inter.*, 2021, **13**, 49982-49992.
- 10 K. K. Bania, R. C. Deka, *J. Phys. Chem. C*, 2012, **116**, 14295–14310.
- 11 W. Ren, G. Nie, P. Zhou, H. Zhang, X. Duan and S. Wang, *Environ. Sci. Technol.*, 2020, **54**, 6438–6447.
